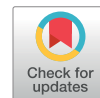

# Erratum

**Erratum. Impact of Perturbed Pancreatic  $\beta$ -Cell Cholesterol Homeostasis on Adipose Tissue and Skeletal Muscle Metabolism. Diabetes 2016;65:3610–3620**

DOI: 10.2337/db17-er02b

In the article listed above, a funding source was erroneously omitted. This work was partially funded by National Institutes of Health grant P01 HL087123 (to A.R.T.). The authors regret this omission.

The online version has been updated to reflect this correction.

Blake J. Cochran, Liming Hou,  
Anil Paul Chirackal Manavalan,  
Benjamin M. Moore, Fatiha Tabet,  
Afroza Sultana, Luisa Cuesta Torres,  
Shudi Tang, Sudichhya Shrestha,  
Praween Senanayake, Mili Patel,  
William J. Ryder, Andre Bongers,  
Marie Maraninchi, Valerie C. Wasinger,  
Marit Westerterp, Alan R. Tall,  
Philip J. Barter, and Kerry-Anne Rye
